# Supplementary material for: Size distribution and coating thickness of black carbon from the Canadian oil sands operations
Source: Copernicus journal article supplement (doi:10.5194/acp-2017-1015), 2017-11-22
Supplement: Supplementary file 1 [file acp-2017-1015-supplement.pdf]

**Table S1.** A summary of rBC size distribution parameters for the 14 emission flights, including MMD (mass median diameter; in nm),  $Width_{mass}$  (mass distribution width; dimensionless), NMD (number median diameter; in nm), and  $Width_{number}$  (number distribution width; dimensionless).

| Date (flight ID)          | MMD               | $Width_{mass}$  | NMD              | $Width_{number}$ |
|---------------------------|-------------------|-----------------|------------------|------------------|
| 14 August, 2013 (F_8/14)  | $153.75 \pm 0.64$ | $0.71 \pm 0.01$ | $76.18 \pm 0.64$ | $0.67 \pm 0.01$  |
| 15 August, 2013 (F_8/15)  | $144.82 \pm 0.54$ | $0.74 \pm 0.01$ | $66.99 \pm 0.44$ | $0.71 \pm 0.01$  |
| 17 August, 2013 (F_8/17)  | $145.70 \pm 1.57$ | $0.72 \pm 0.02$ | $66.61 \pm 1.33$ | $0.73 \pm 0.02$  |
| 19 August, 2013 (F_8/19)  | $141.82 \pm 0.58$ | $0.75 \pm 0.01$ | $61.12 \pm 0.65$ | $0.75 \pm 0.01$  |
| 20 August, 2013 (F_8/20)  | $134.46 \pm 0.99$ | $0.74 \pm 0.02$ | $62.18 \pm 0.80$ | $0.72 \pm 0.01$  |
| 21 August, 2013 (F_8/21)  | $136.19 \pm 0.67$ | $0.70 \pm 0.01$ | $63.99 \pm 0.69$ | $0.72 \pm 0.01$  |
| 22 August, 2013 (F_8/22)  | $141.98 \pm 0.98$ | $0.70 \pm 0.01$ | $64.35 \pm 1.16$ | $0.74 \pm 0.01$  |
| 24 August, 2013 (F_8/24)  | $135.46 \pm 0.94$ | $0.74 \pm 0.02$ | $63.14 \pm 0.56$ | $0.71 \pm 0.01$  |
| 26 August, 2013 (F_8/26)  | $135.02 \pm 0.37$ | $0.61 \pm 0.01$ | $78.38 \pm 0.54$ | $0.61 \pm 0.01$  |
| 28 August, 2013 (F_8/28)  | $138.82 \pm 0.71$ | $0.74 \pm 0.01$ | $63.77 \pm 0.41$ | $0.72 \pm 0.00$  |
| 29 August, 2013 (F_8/29)  | $134.00 \pm 0.46$ | $0.70 \pm 0.01$ | $64.65 \pm 0.48$ | $0.70 \pm 0.01$  |
| 2 September, 2013 (F_9/2) | $135.78 \pm 2.04$ | $0.72 \pm 0.03$ | $63.71 \pm 1.13$ | $0.71 \pm 0.01$  |
| 3 September, 2013 (F_9/3) | $137.53 \pm 0.93$ | $0.76 \pm 0.02$ | $64.64 \pm 0.70$ | $0.70 \pm 0.01$  |
| 6 September, 2013 (F_9/6) | $135.01 \pm 0.77$ | $0.71 \pm 0.01$ | $66.00 \pm 0.71$ | $0.69 \pm 0.01$  |

**Table S2.** A summary of rBC size distribution parameters for the 3 transformation flights. Results from successive flight screens are shown separately for each flight.

| Flight and screen ID             | MMD           | Width <sub>mass</sub> | NMD          | Width <sub>number</sub> |
|----------------------------------|---------------|-----------------------|--------------|-------------------------|
| <i>4 September, 2013 (F_9/4)</i> |               |                       |              |                         |
| Screen #1                        | 140.87 ± 0.43 | 0.70 ± 0.01           | 69.07 ± 0.36 | 0.69 ± 0.00             |
| Screen #2                        | 141.13 ± 0.88 | 0.71 ± 0.01           | 71.59 ± 0.62 | 0.67 ± 0.01             |
| Screen #3                        | 147.47 ± 1.45 | 0.74 ± 0.02           | 71.11 ± 0.95 | 0.69 ± 0.01             |
| Screen #4                        | 146.97 ± 2.71 | 0.76 ± 0.04           | 71.11 ± 0.89 | 0.68 ± 0.01             |
| Screen #5                        | 142.42 ± 0.60 | 0.68 ± 0.01           | 72.00 ± 0.47 | 0.67 ± 0.01             |
| <i>19 August, 2013 (F_8/19)</i>  |               |                       |              |                         |
| Screen #1                        | 139.76 ± 1.67 | 0.76 ± 0.03           | 58.21 ± 2.26 | 0.77 ± 0.03             |
| Screen #2                        | 139.33 ± 1.78 | 0.74 ± 0.03           | 63.33 ± 2.04 | 0.73 ± 0.02             |
| Screen #3                        | 145.12 ± 1.57 | 0.79 ± 0.02           | 59.33 ± 2.29 | 0.78 ± 0.03             |
| <i>5 September, 2013 (F_9/5)</i> |               |                       |              |                         |
| Screen #1                        | 149.85 ± 2.46 | 0.74 ± 0.03           | 70.88 ± 1.23 | 0.70 ± 0.02             |
| Screen #2                        | 148.79 ± 1.19 | 0.67 ± 0.02           | 72.67 ± 0.92 | 0.70 ± 0.01             |
| Screen #3                        | 151.62 ± 1.54 | 0.71 ± 0.02           | 73.48 ± 1.51 | 0.70 ± 0.02             |

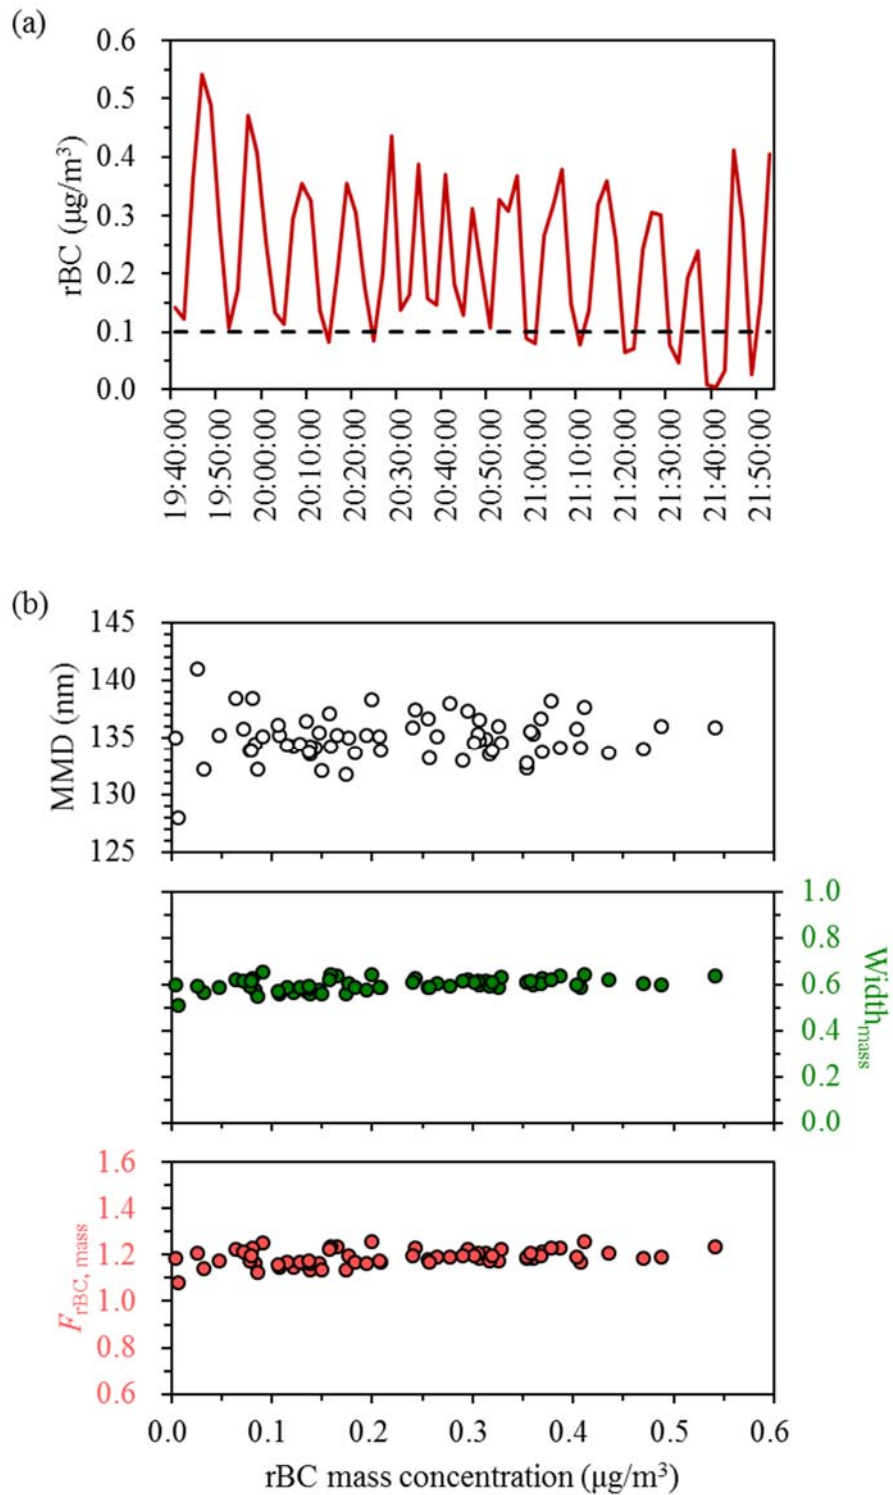

**Figure S1.** (a) Temporal variation of 2-min averaged rBC mass concentration during F\_8/26, and (b) dependences of rBC MMD,  $\text{Width}_{\text{mass}}$  and  $F_{\text{rBC, mass}}$  on rBC concentration. The dashed line in (a) indicates an rBC concentration of  $0.1 \mu\text{g}/\text{m}^3$  which can be used to distinguish the typical in- and out-of-plume conditions for this flight.

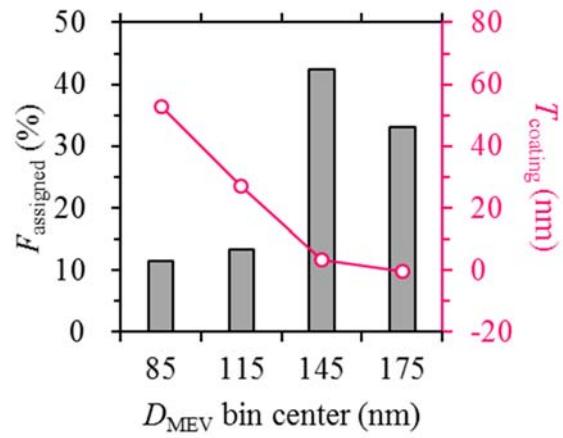

**Figure S2.** Dependences of coating thickness ( $T_{\text{coating}}$ ) and the fraction of rBC cores that can be assigned a coating thickness ( $F_{\text{assigned}}$ , in %) on rBC core size ( $D_{\text{MEV}}$ ) for the emission flight F\_9/3. Refer to the caption of Figure 10 in the main manuscript for more details.

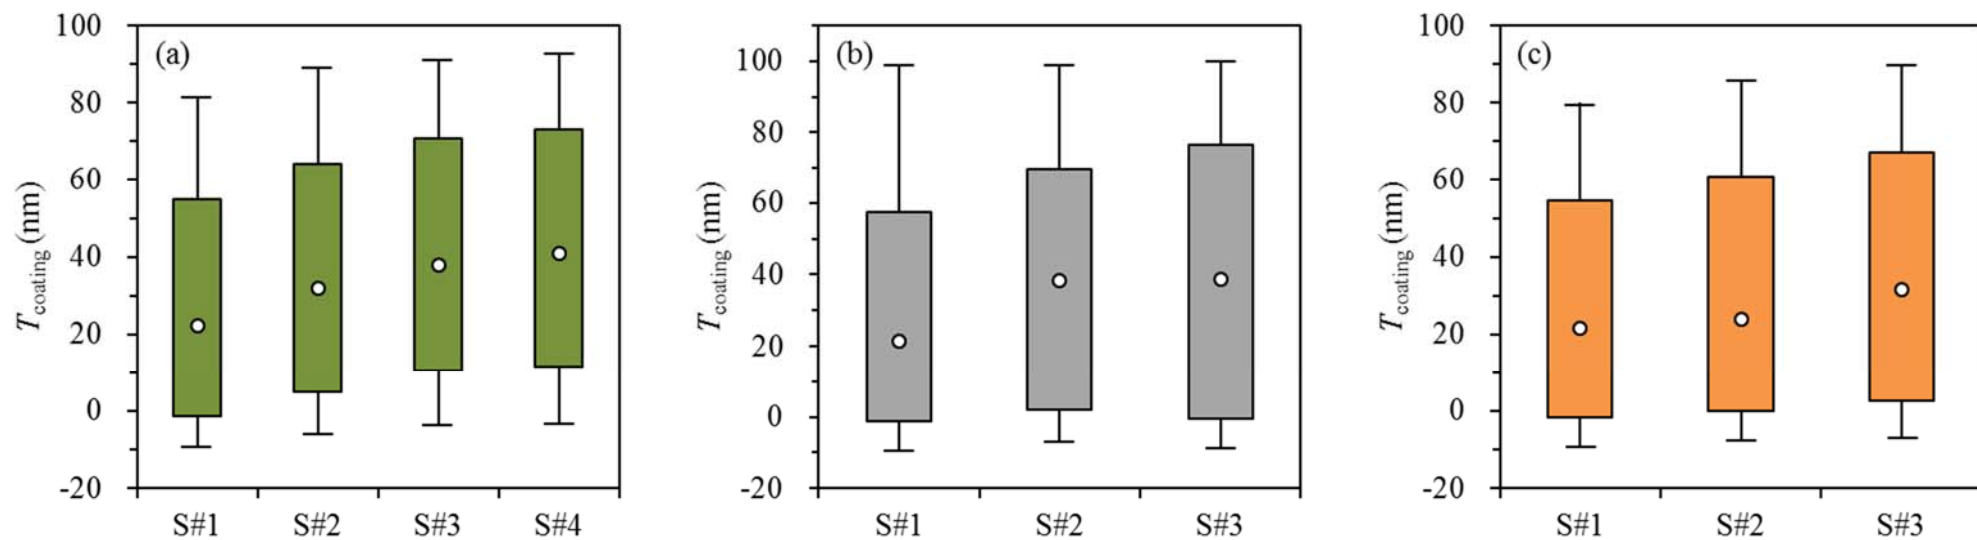

**Figure S3.** Evolutions of in-plume coating thickness ( $T_{\text{coating}}$ ) for rBC cores in the  $D_{\text{MEV}}$  range of 130–160 nm during the transformation flights (a) F\_9/4, (b) F\_8/19 and (c) F\_9/5. The counts of the 130–160 nm rBC cores that can be assigned a coating thickness are  $\sim 2450$ – $3600$ ,  $300$ – $400$ , and  $700$ – $1600$  for successive flight screens of F\_9/4, F\_8/19 and F\_9/5, respectively.  $F_{\text{assigned}}$  are  $\sim 35$ – $45\%$ ,  $30$ – $35\%$ , and  $30$ – $45\%$  for the 130–160 nm rBC cores observed during F\_9/4, F\_8/19 and F\_9/5, respectively.
